# Supplementary material for: Outcomes of Balloon-Expandable Transcatheter Aortic Valve Replacement in Younger Patients in the Low-Risk Era
Source: PubMed Central journal article supplement — JAMA Cardiol. 2024 Oct 30;10(2):127–35. doi: 10.1001/jamacardio.2024.4237 (PMC11525662; doi:10.1001/jamacardio.2024.4237), 2024-10-30
Supplement: jamacardiol-e244237-s002.pdf [file jamacardiol-e244237-s002.pdf]

## Data Sharing Statement

Coylewright. Outcomes of Balloon-Expandable Transcatheter Aortic Valve Replacement in Younger Patients in the Low-Risk Era. *JAMA Cardiol.* Published October 30, 2024.  
doi:10.1001/jamacardio.2024.4237

### Data

**Data available:** No
